# Supplementary material for: Stereoselective synthesis and biological evaluation of d-fagomine, d-3-epi-fagomine and d-3,4-epi-fagomine analogs from d-glyceraldehyde acetonide as a common building block
Source: Royal Society of Chemistry journal article supplement (doi:10.1039/c2ob26732b), 2012-01-01
Supplement: c2ob26732b.pdf [file c2ob26732b.pdf]

# Stereoselective synthesis and biological evaluation of D-fagomine, D-3-*epi*-fagomine and D-3,4-*epi*-fagomine analogs from D-glyceraldehyde acetonide as a common building block

J. Alberto Díez,<sup>a</sup> José A. Gálvez,<sup>a\*</sup> María D. Díaz de Villegas,<sup>a\*</sup> Ramón Badorrey,<sup>a</sup> Barbara Bartholomew,<sup>b</sup> and Robert J. Nash<sup>b</sup>

<sup>a</sup> Departamento de Catálisis y Procesos Catalíticos, Instituto de Síntesis Química y Catálisis Homogénea (ISQCH), CSIC - Universidad de Zaragoza, Pedro Cerbuna 12, E-50009 Zaragoza, Spain. Fax: +34976761202; Tel: +34976762274; E-mail: [loladiaz@unizar.es](mailto:loladiaz@unizar.es).

<sup>b</sup> Phytoquest Limited, Plas Gogerddan, Aberystwyth, Ceredigion, SY23 3EB, UK.

## Table of contents

|                                                                              |    |
|------------------------------------------------------------------------------|----|
| <sup>1</sup> H NMR and <sup>13</sup> C NMR spectra for compound <b>4</b>     | 2  |
| <sup>1</sup> H NMR and <sup>13</sup> C NMR spectra for compound <b>5</b>     | 3  |
| <sup>1</sup> H NMR and <sup>13</sup> C NMR spectra for compound <b>6</b>     | 4  |
| <sup>1</sup> H NMR and <sup>13</sup> C NMR spectra for compound <b>7</b>     | 5  |
| <sup>1</sup> H NMR and <sup>13</sup> C NMR spectra for compound <b>8</b>     | 6  |
| <sup>1</sup> H NMR and <sup>13</sup> C NMR spectra for compound <b>9</b>     | 7  |
| <sup>1</sup> H NMR and <sup>13</sup> C NMR spectra for compound <b>10</b>    | 8  |
| <sup>1</sup> H NMR and <sup>13</sup> C NMR spectra for compound <b>11</b>    | 9  |
| <sup>1</sup> H NMR and <sup>13</sup> C NMR spectra for compound <b>12</b>    | 10 |
| <sup>1</sup> H NMR and <sup>13</sup> C NMR spectra for compound <b>13</b>    | 11 |
| <sup>1</sup> H NMR and <sup>13</sup> C NMR spectra for compound <b>1</b>     | 12 |
| <sup>1</sup> H NMR and <sup>13</sup> C NMR spectra for compound <b>2·TFA</b> | 13 |
| <sup>1</sup> H NMR and <sup>13</sup> C NMR spectra for compound <b>14</b>    | 14 |
| <sup>1</sup> H NMR and <sup>13</sup> C NMR spectra for compound <b>15</b>    | 15 |
| <sup>1</sup> H NMR and <sup>13</sup> C NMR spectra for compound <b>3</b>     | 16 |
| Selective ge-1D ROESY on compound <b>1</b>                                   | 17 |
| Data of glycosidase inhibition assays for compounds <b>1, 2 and 3</b>        | 18 |

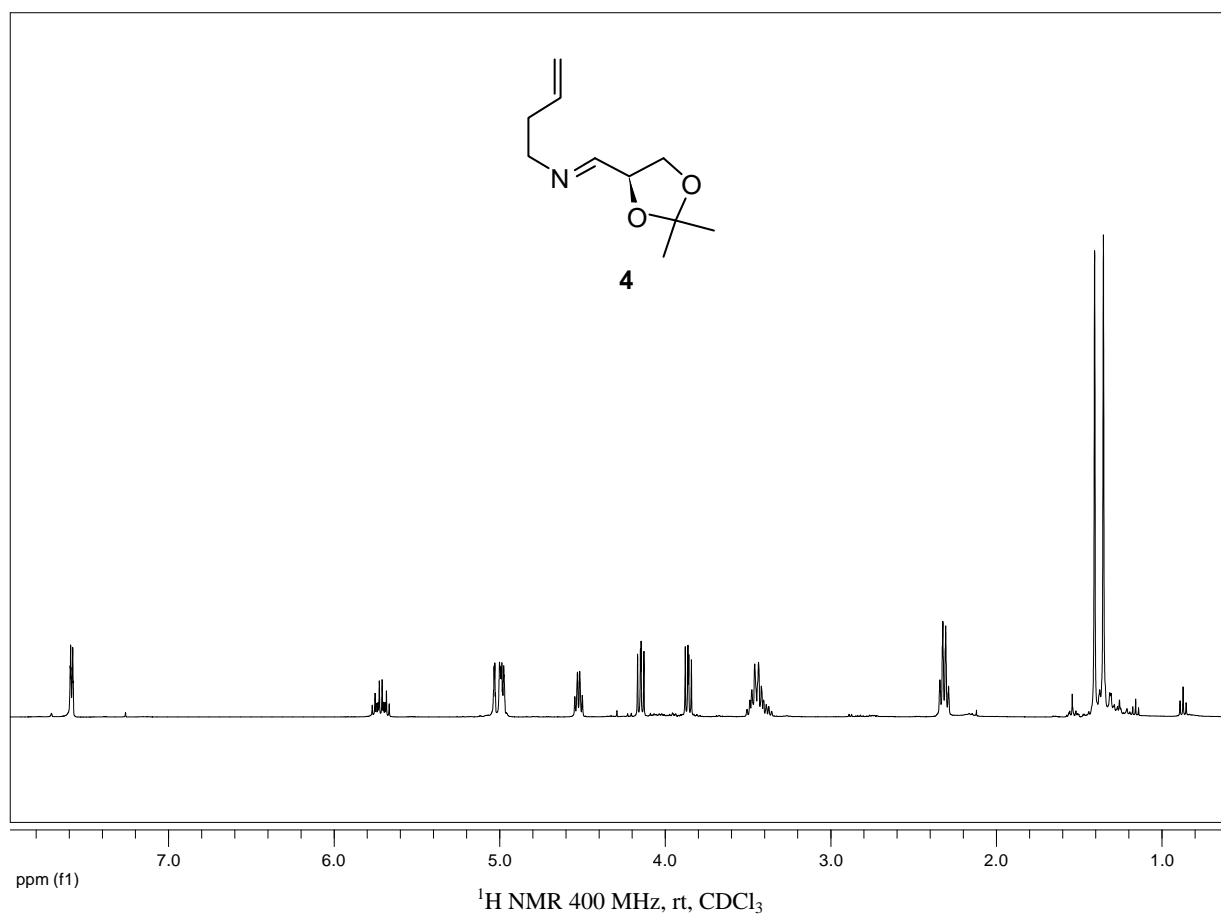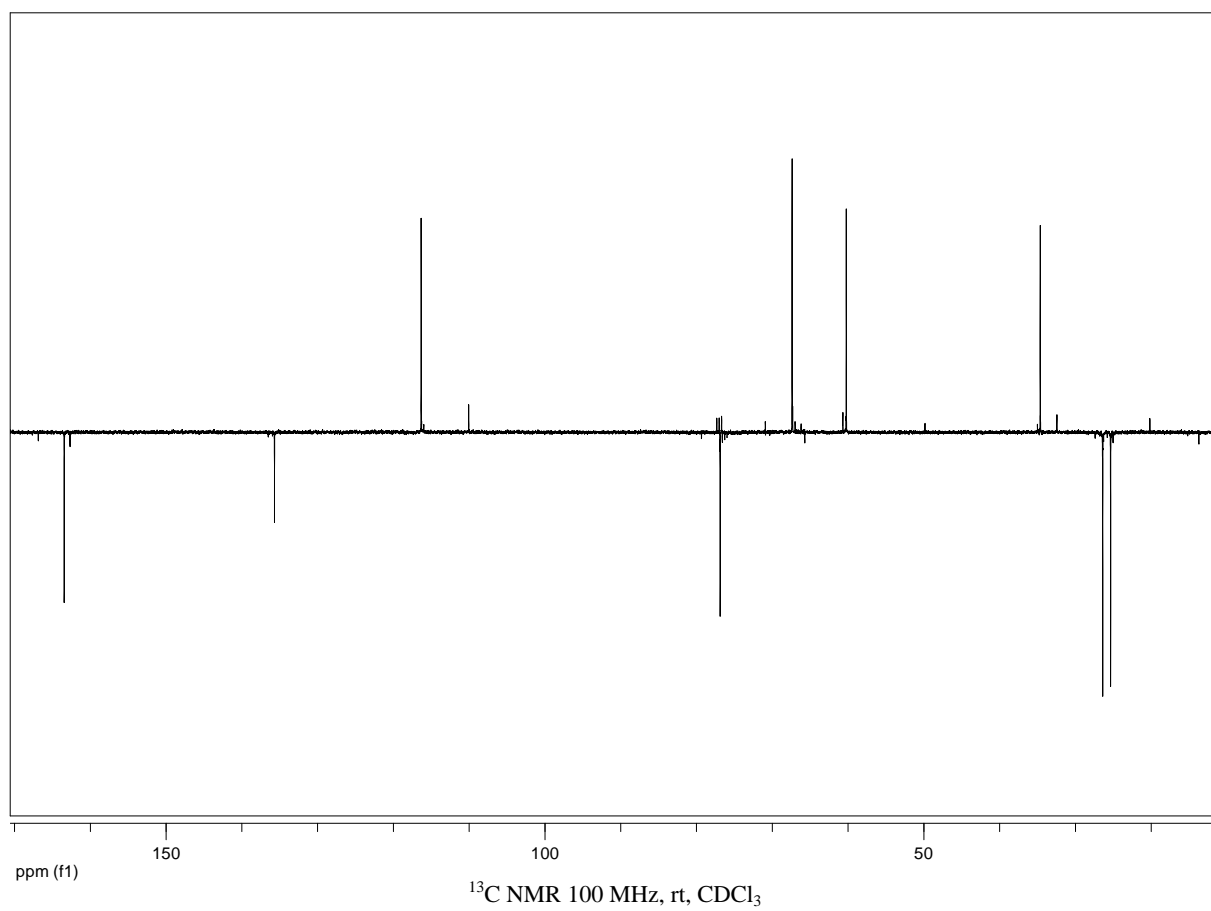

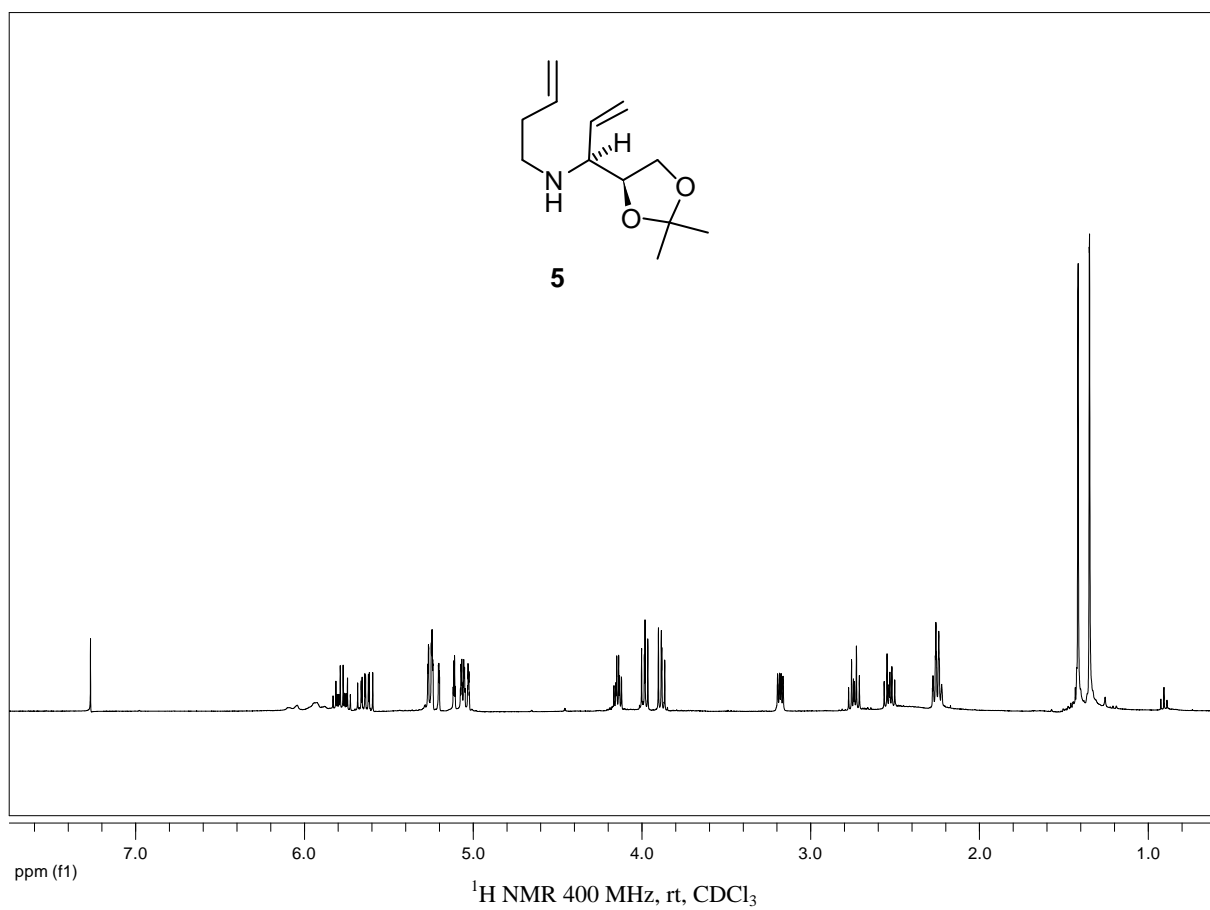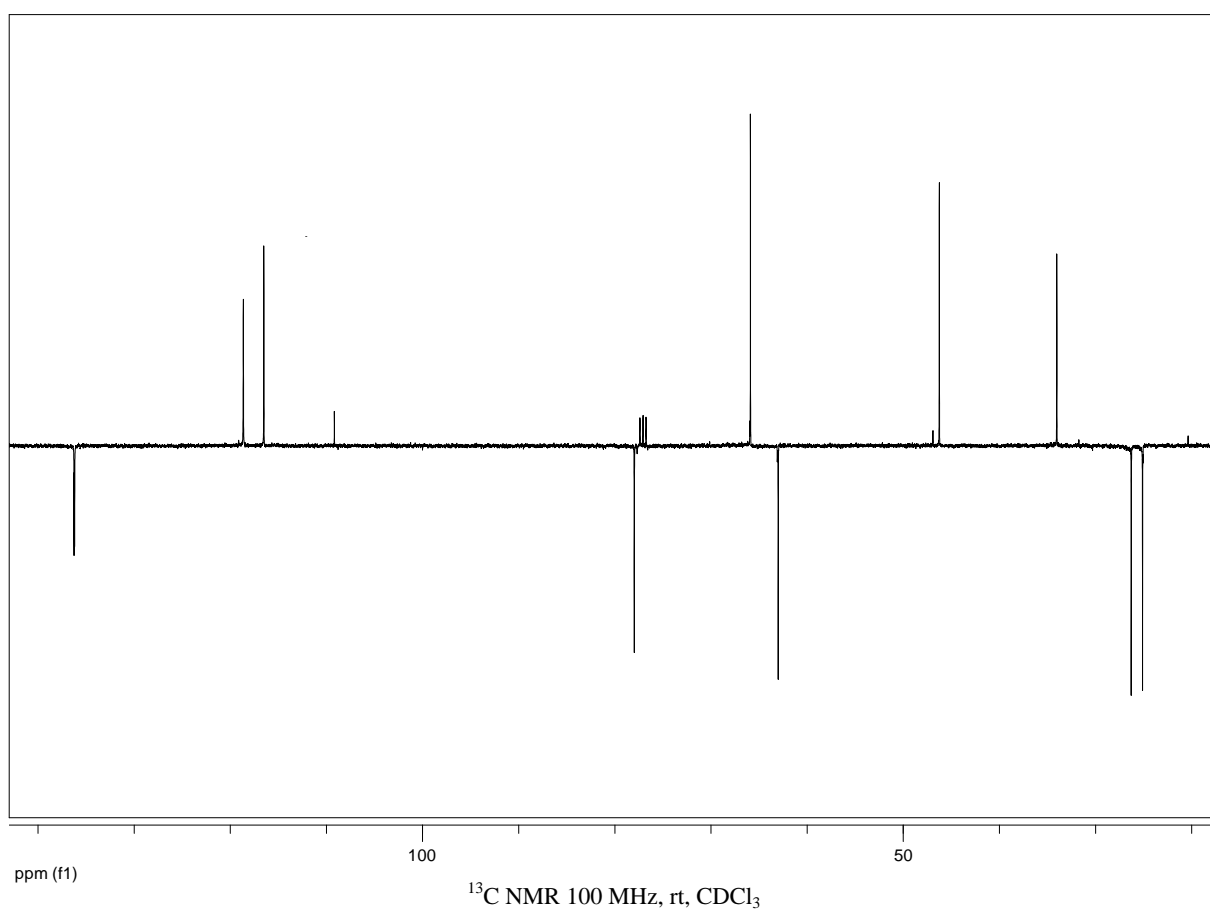

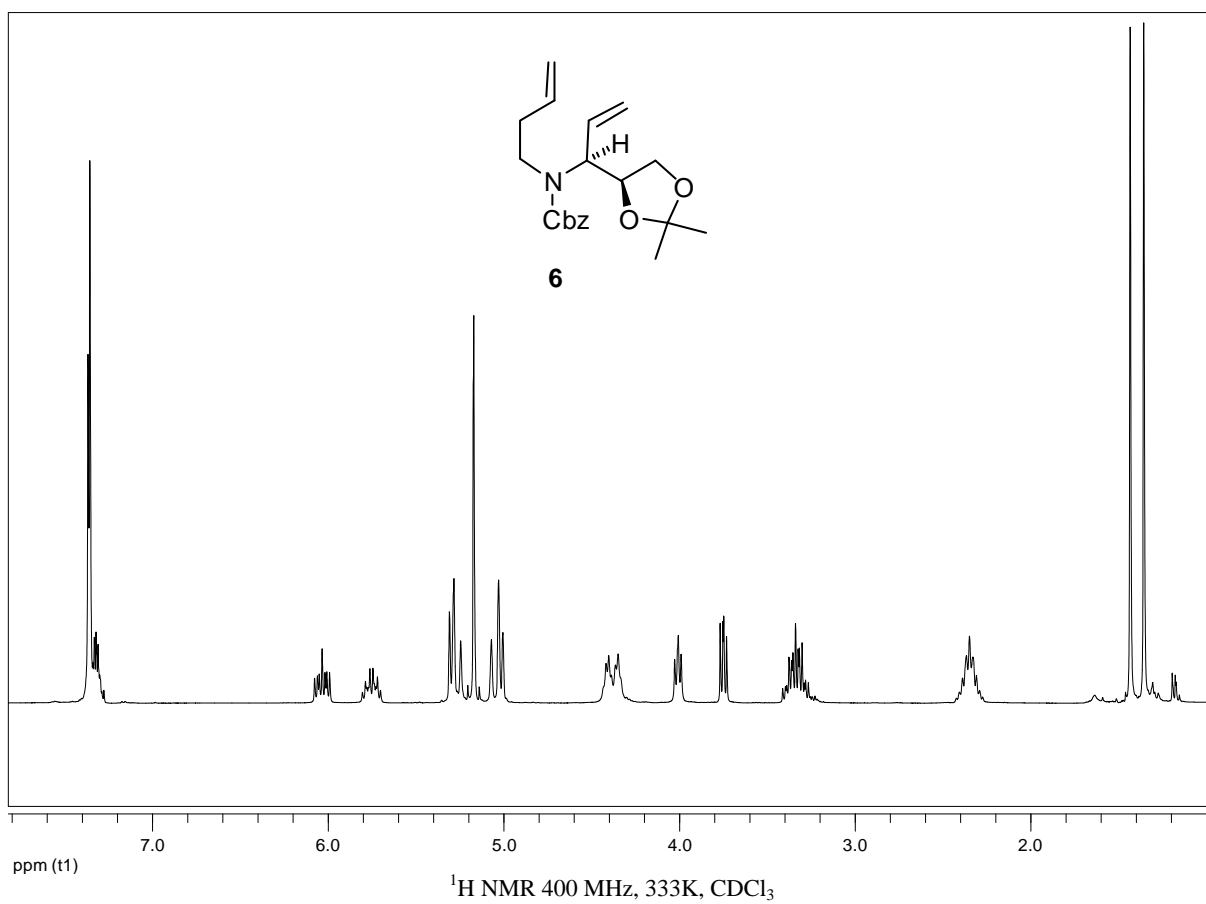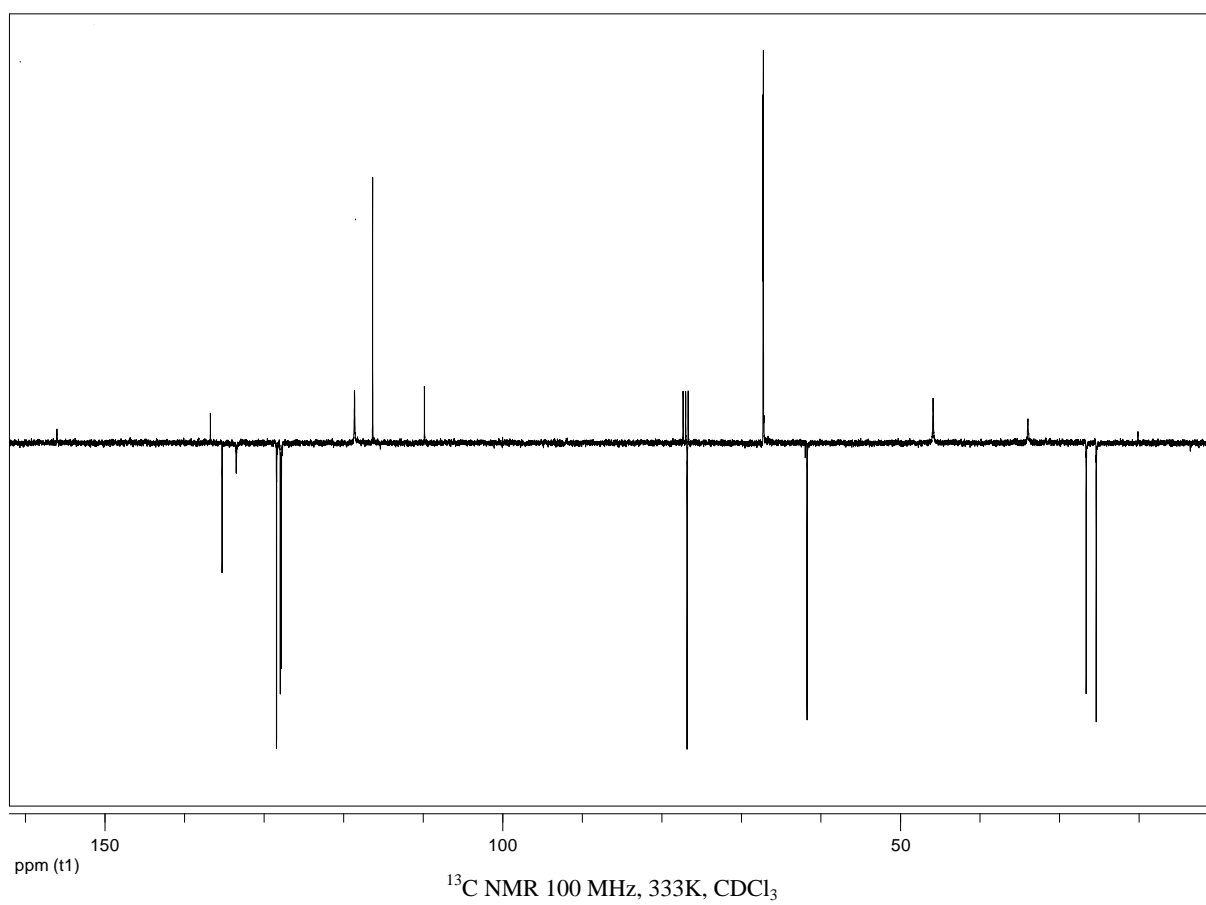

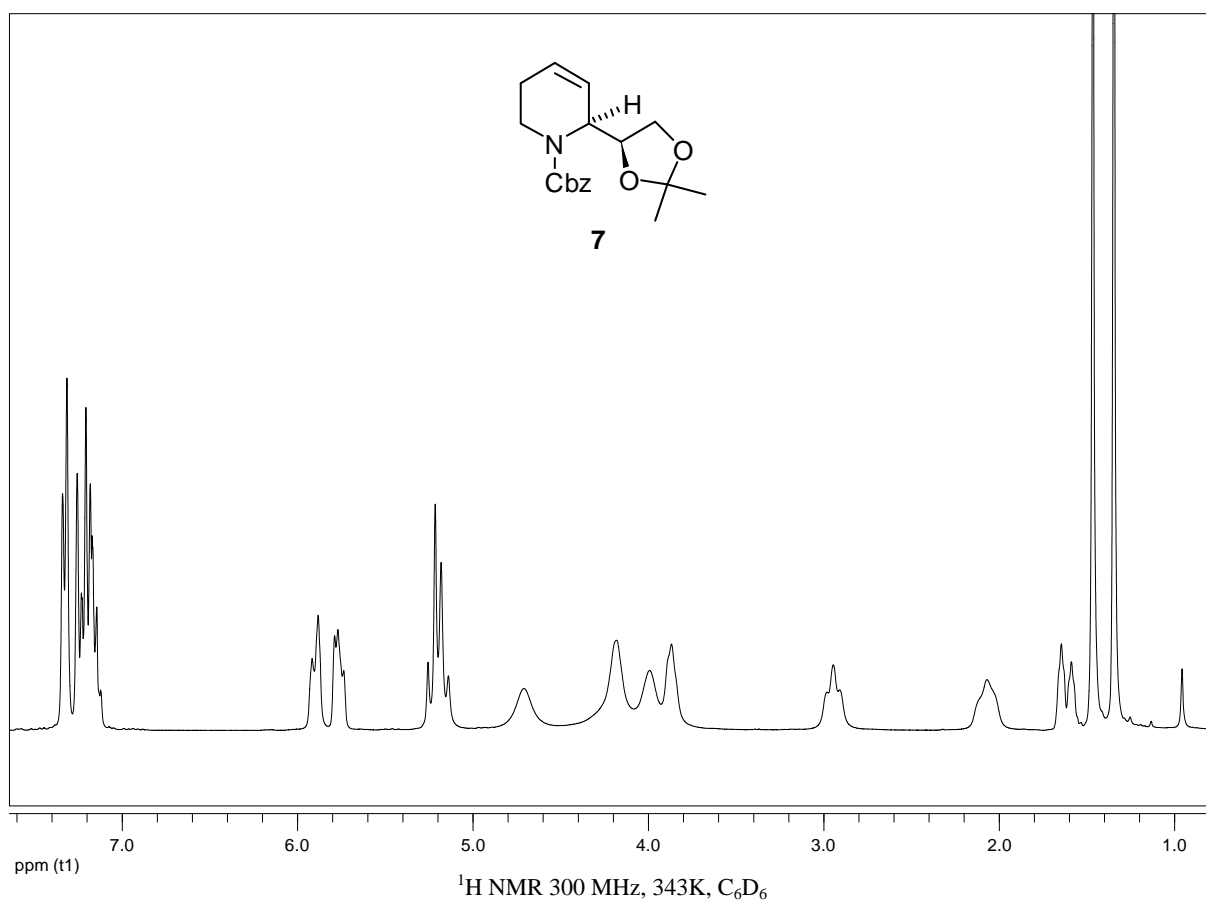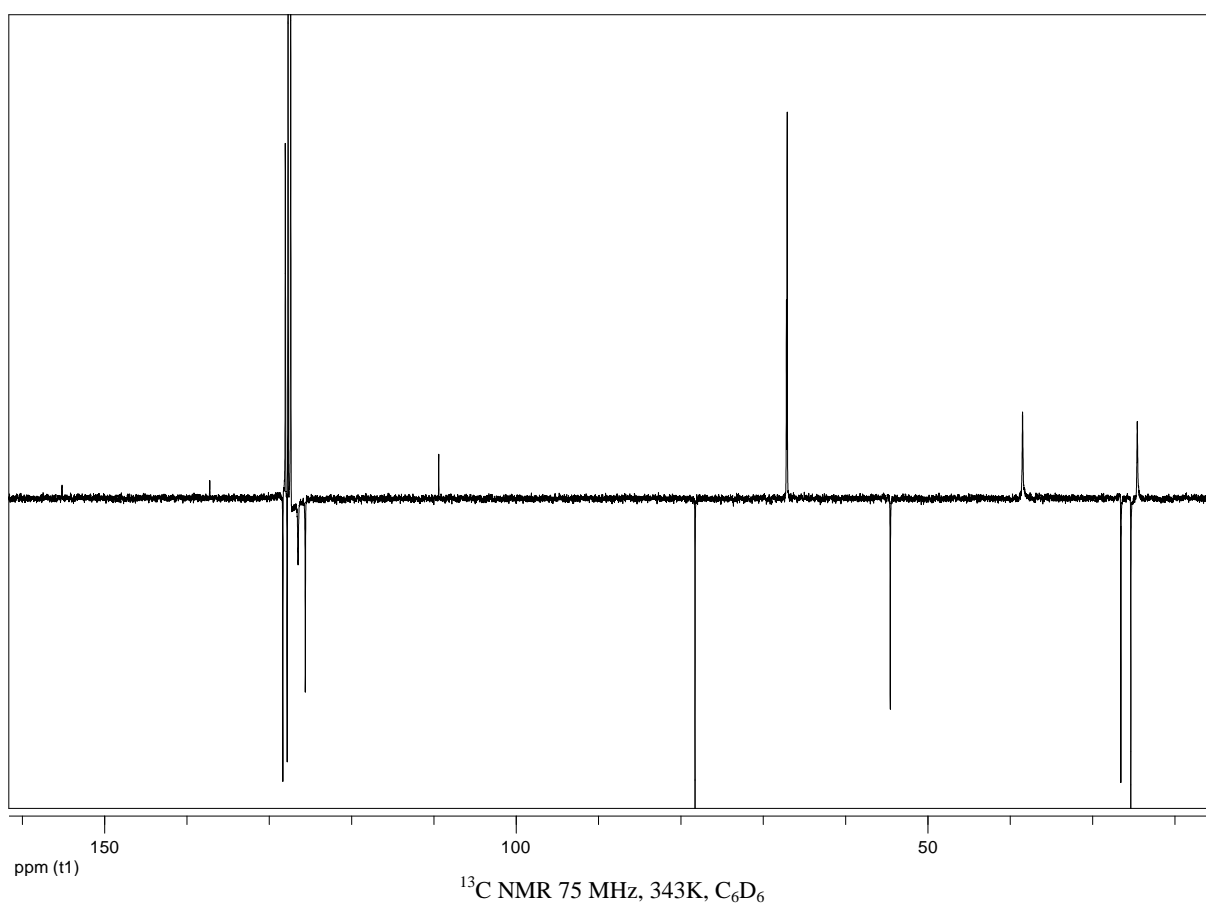

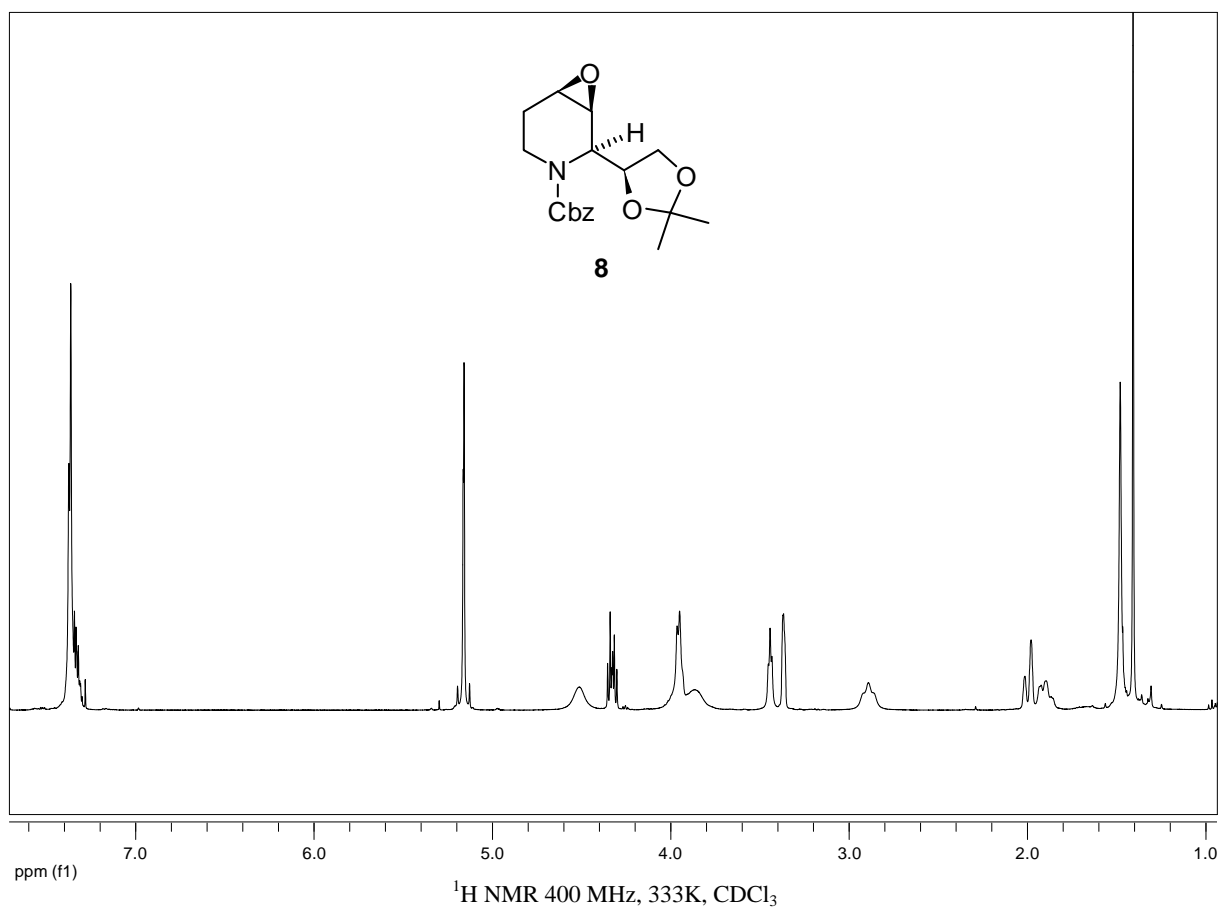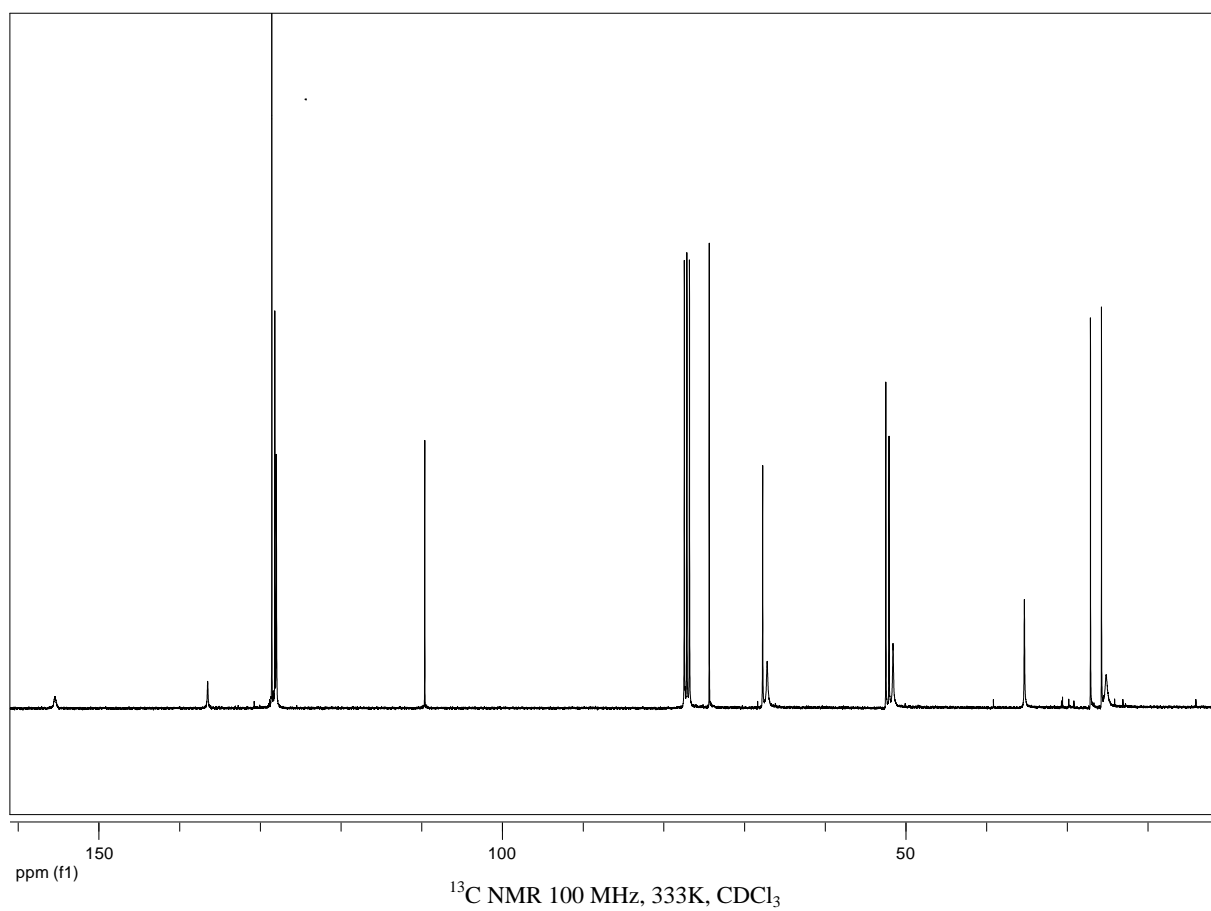

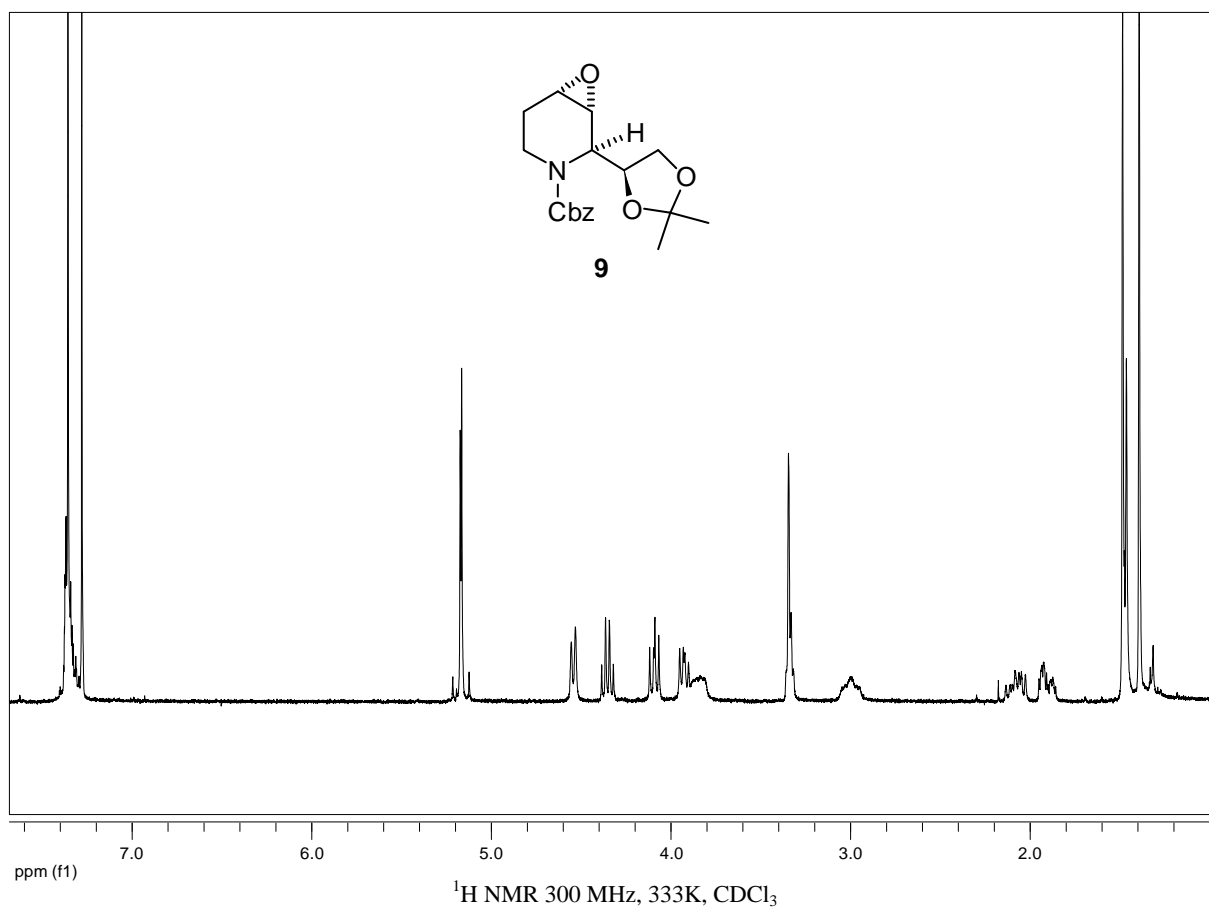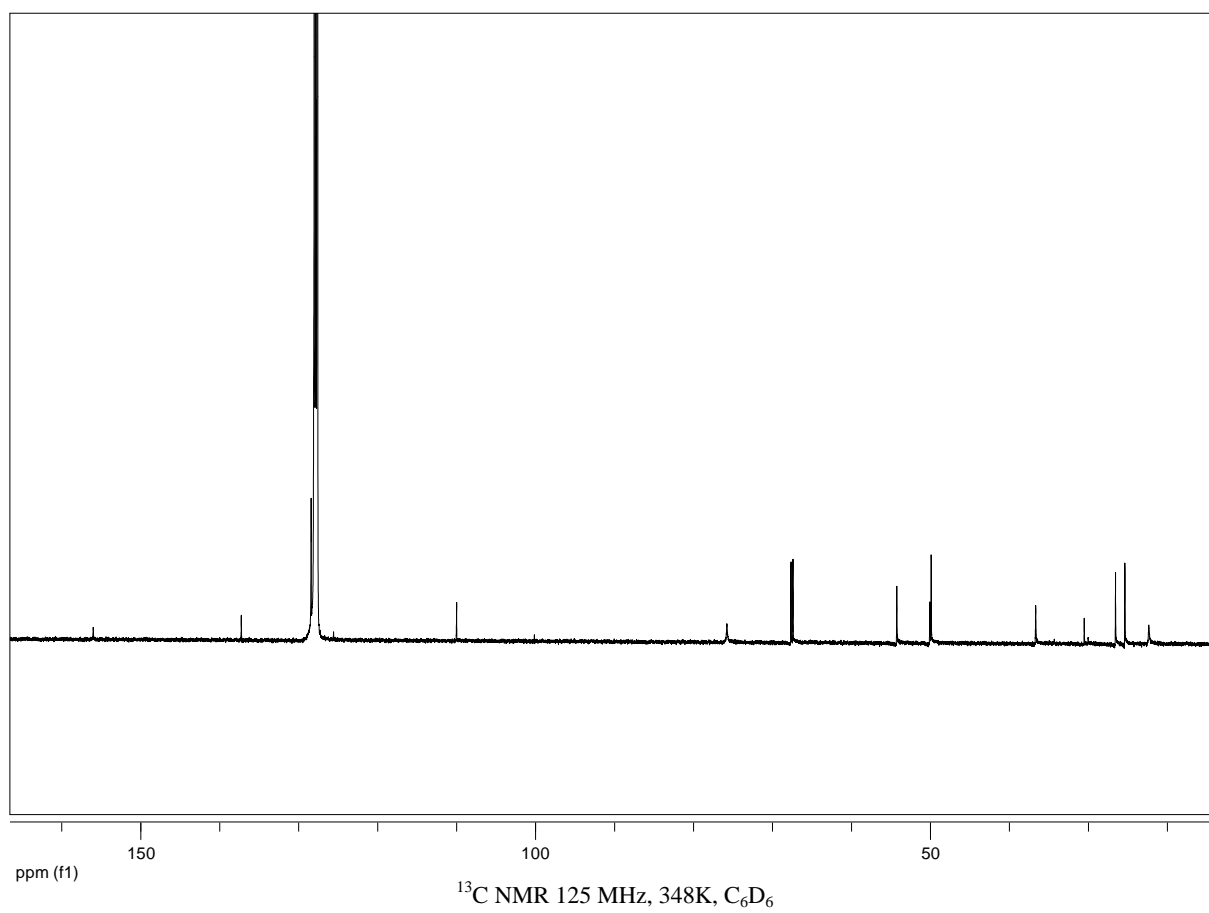

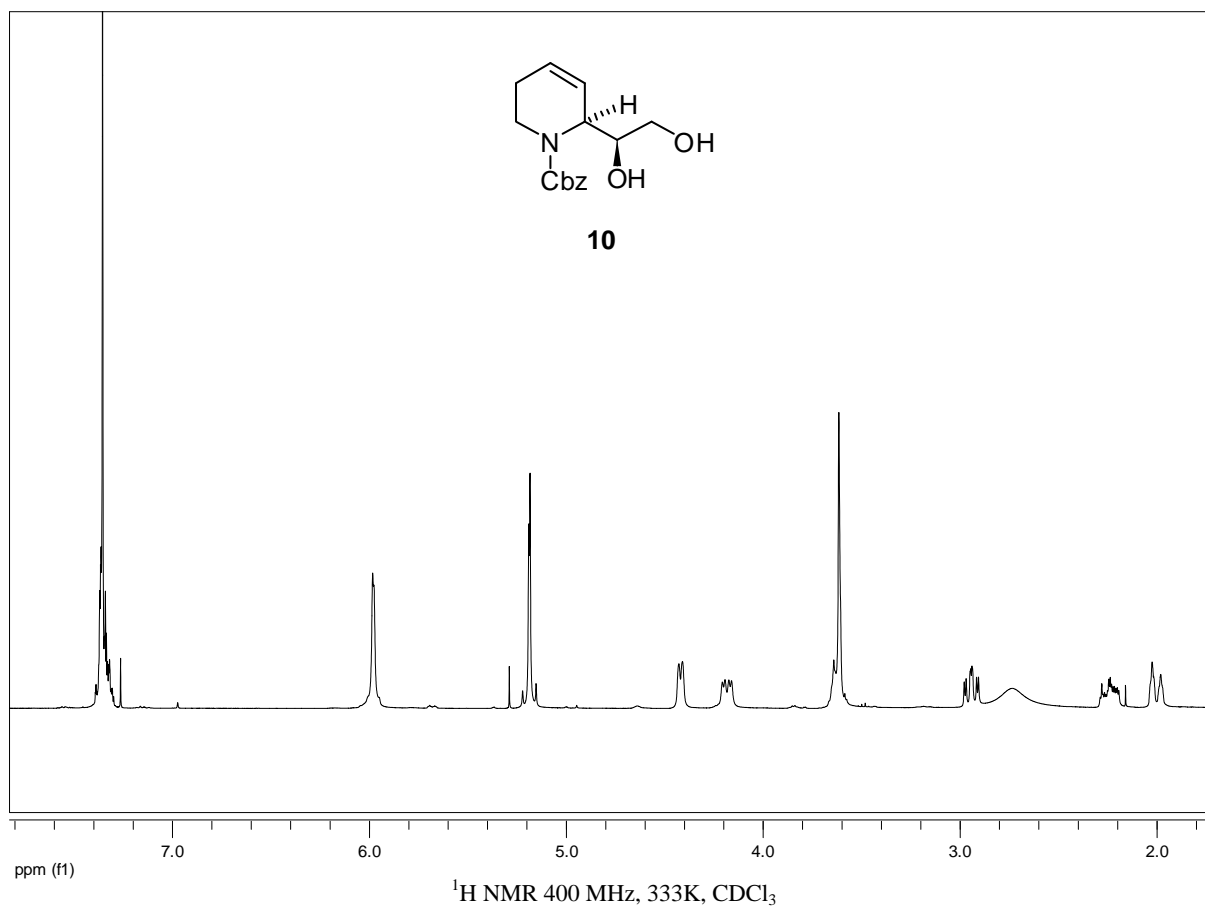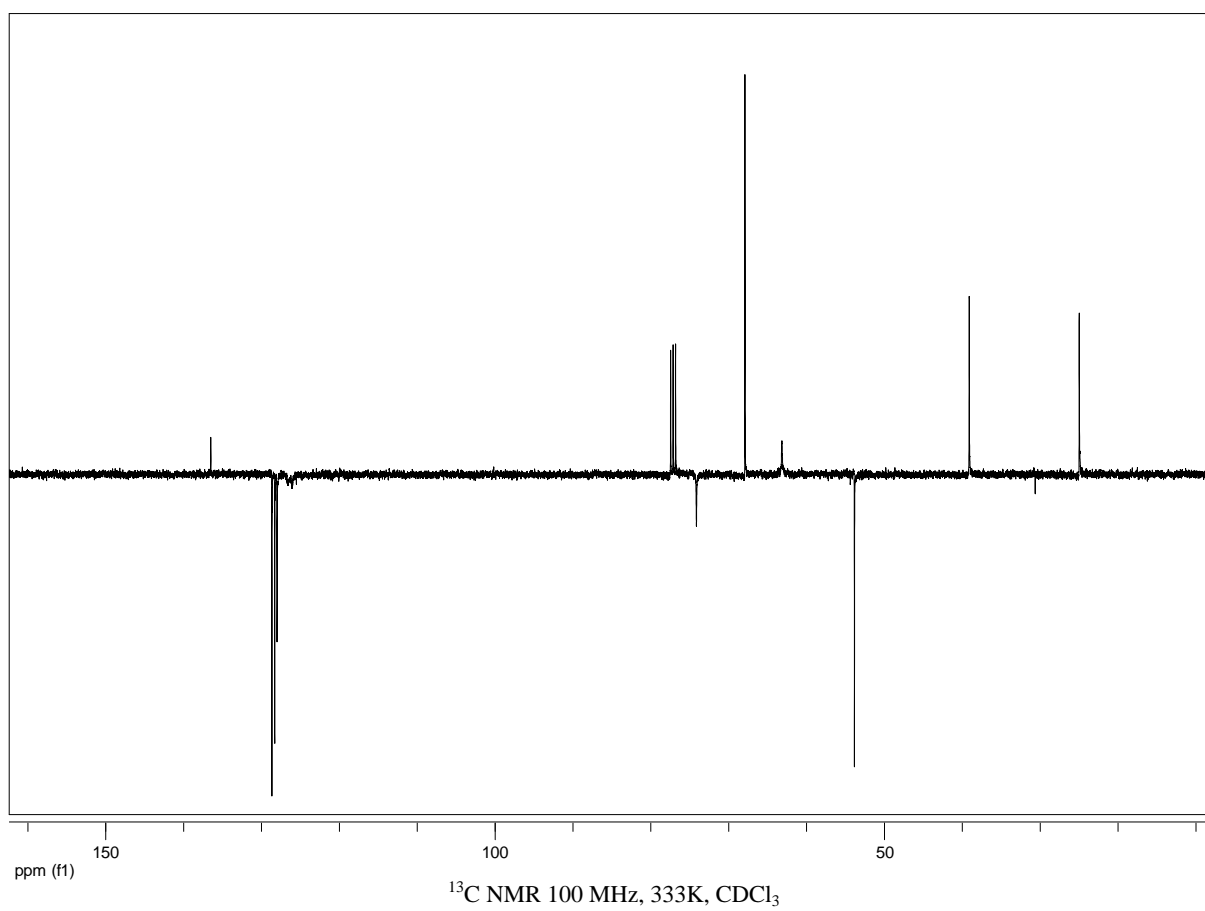



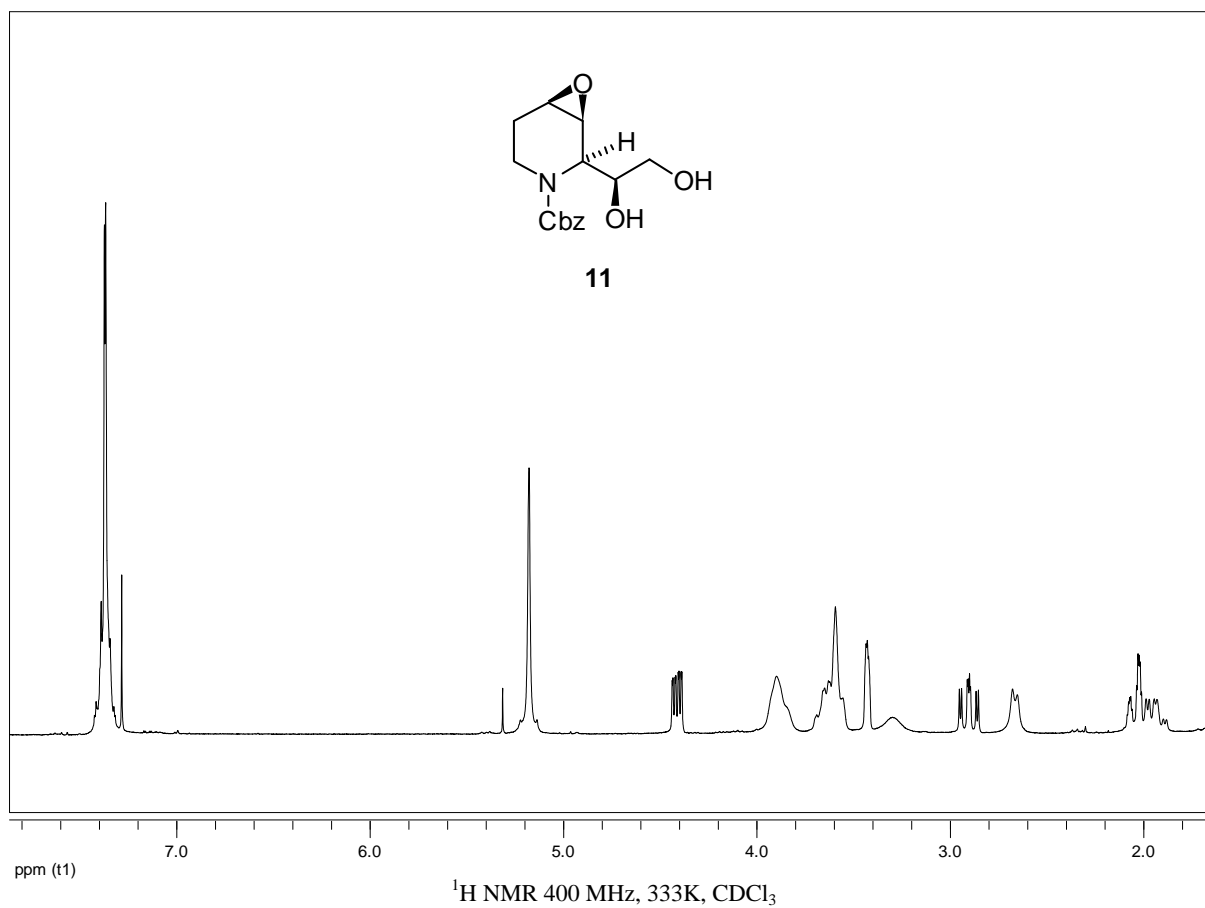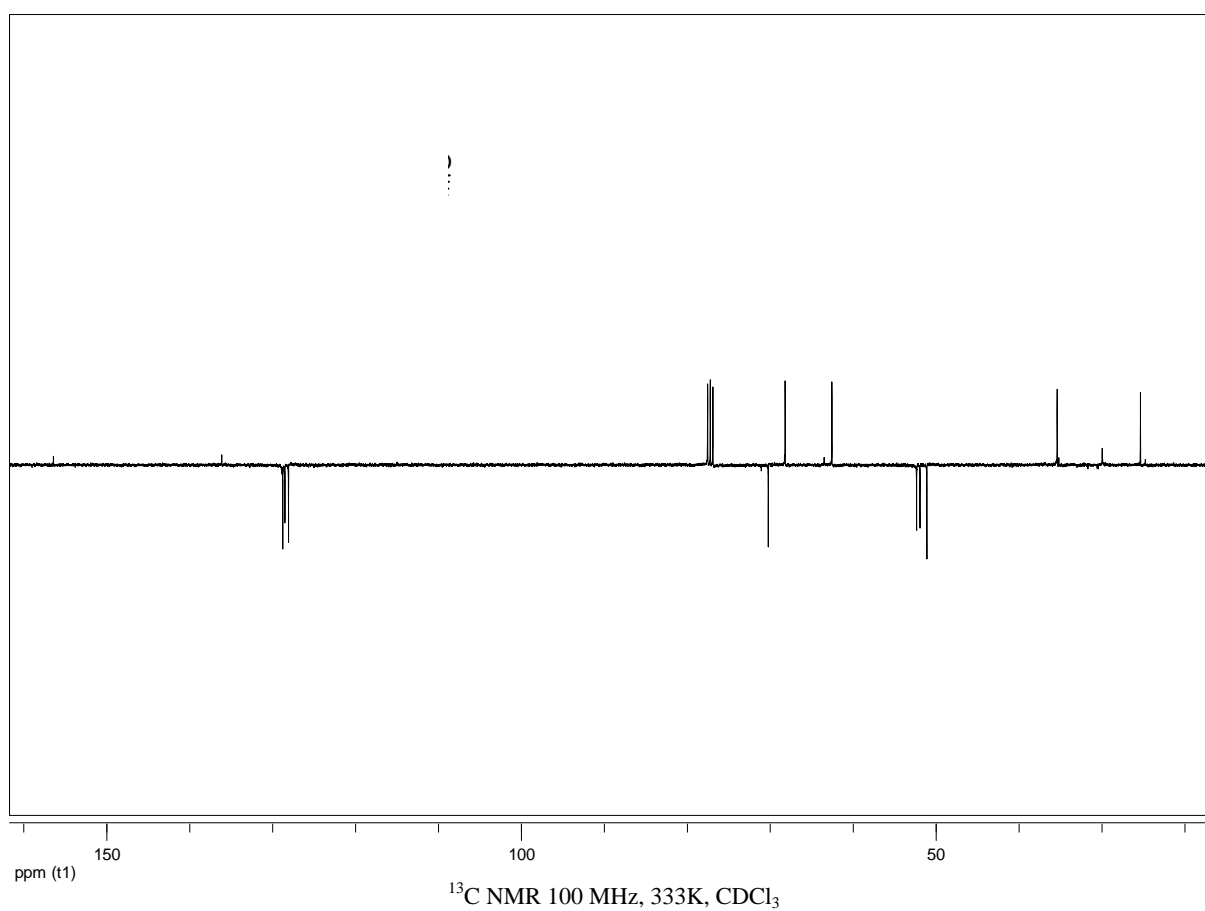

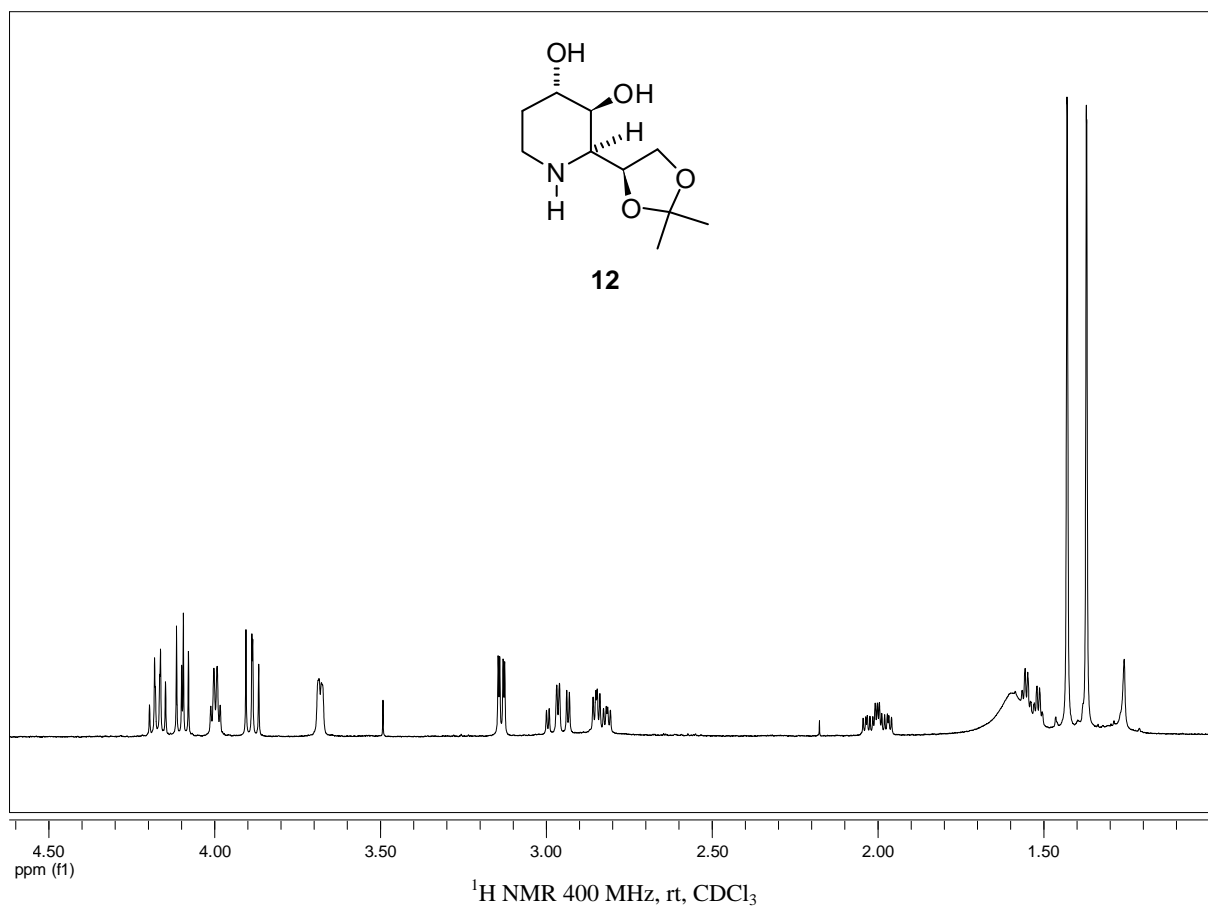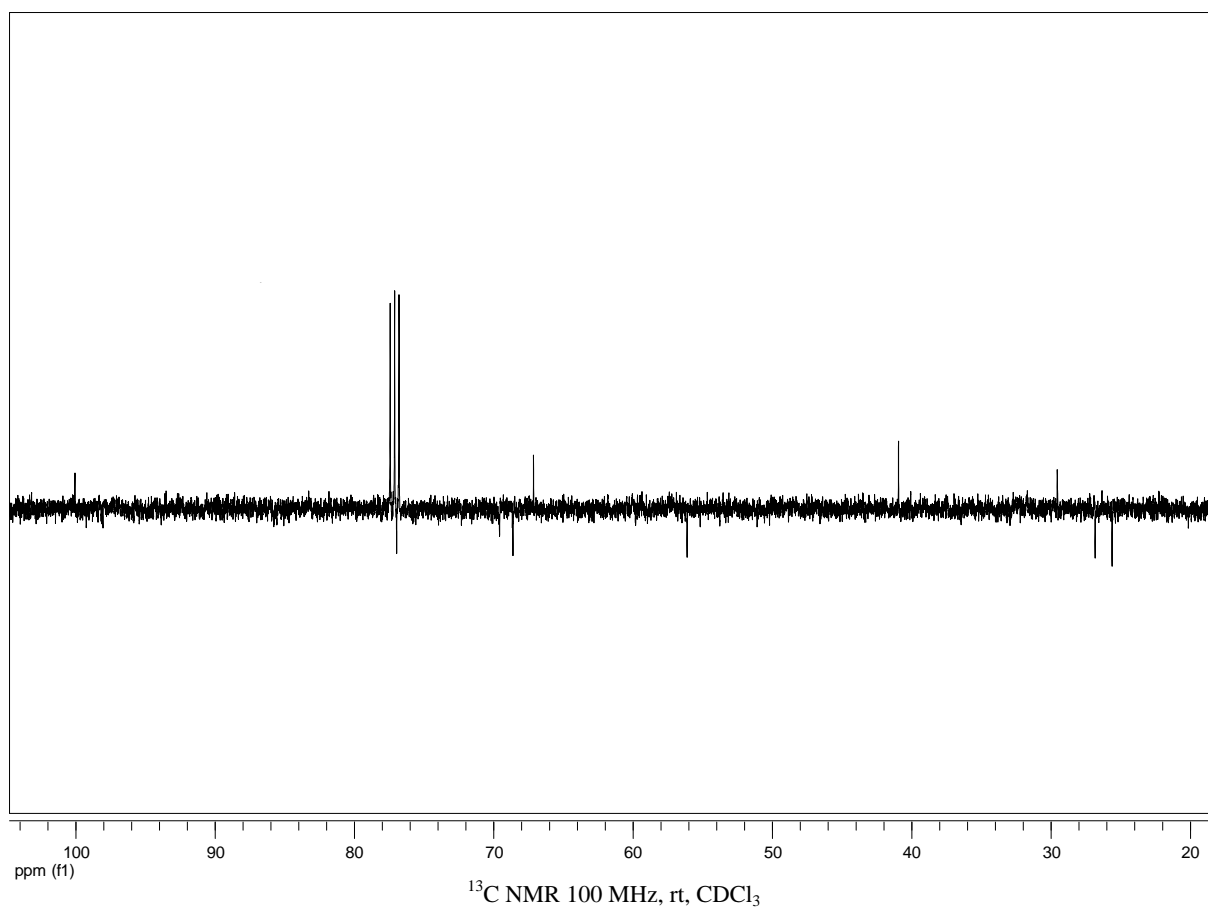



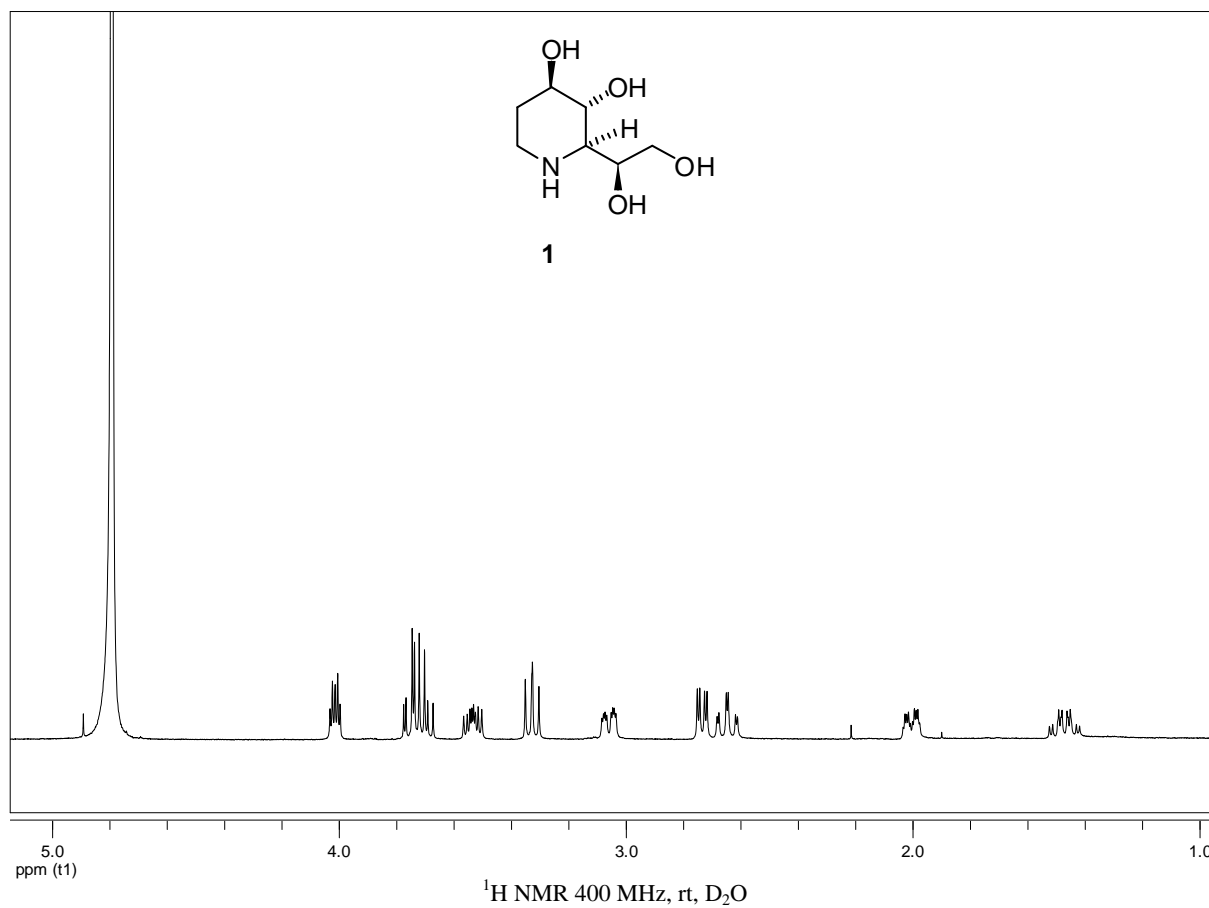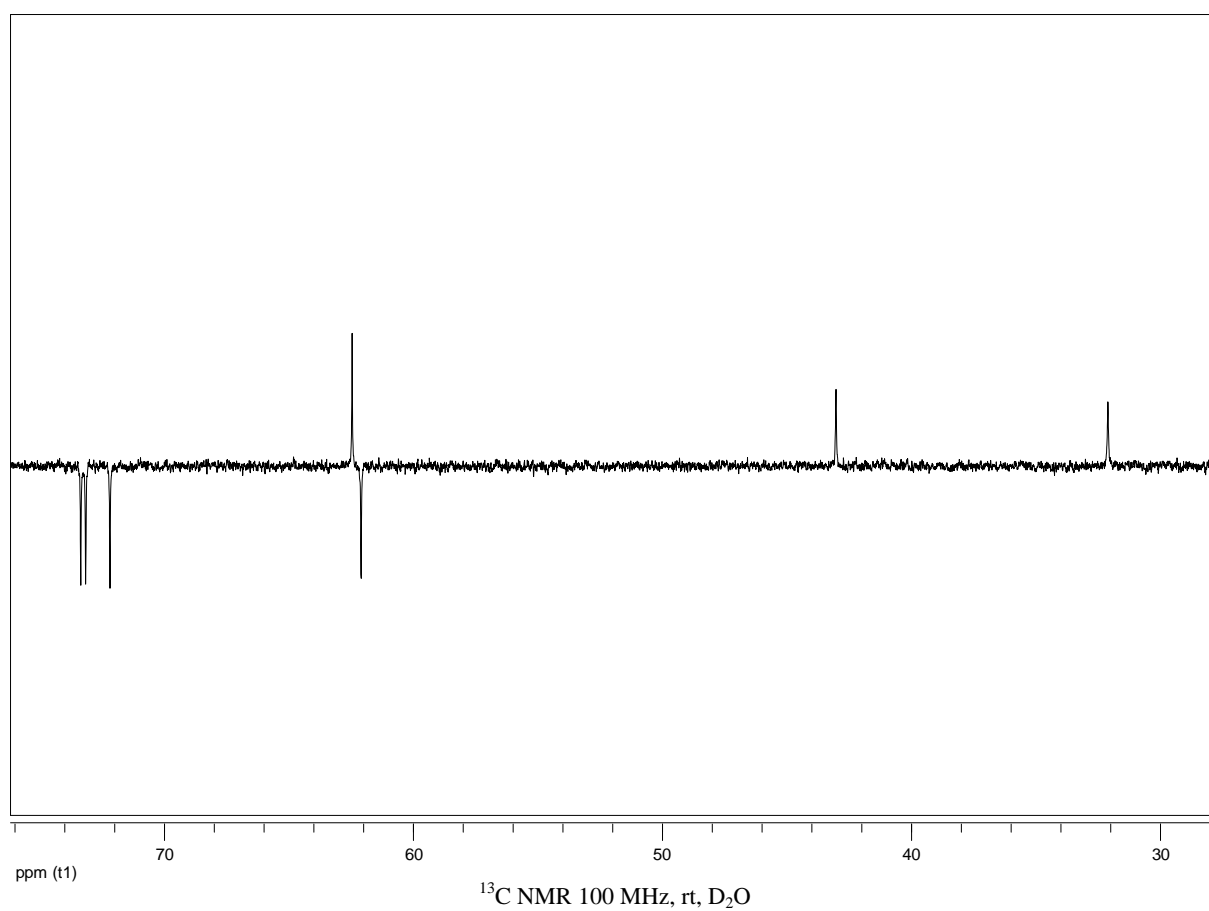

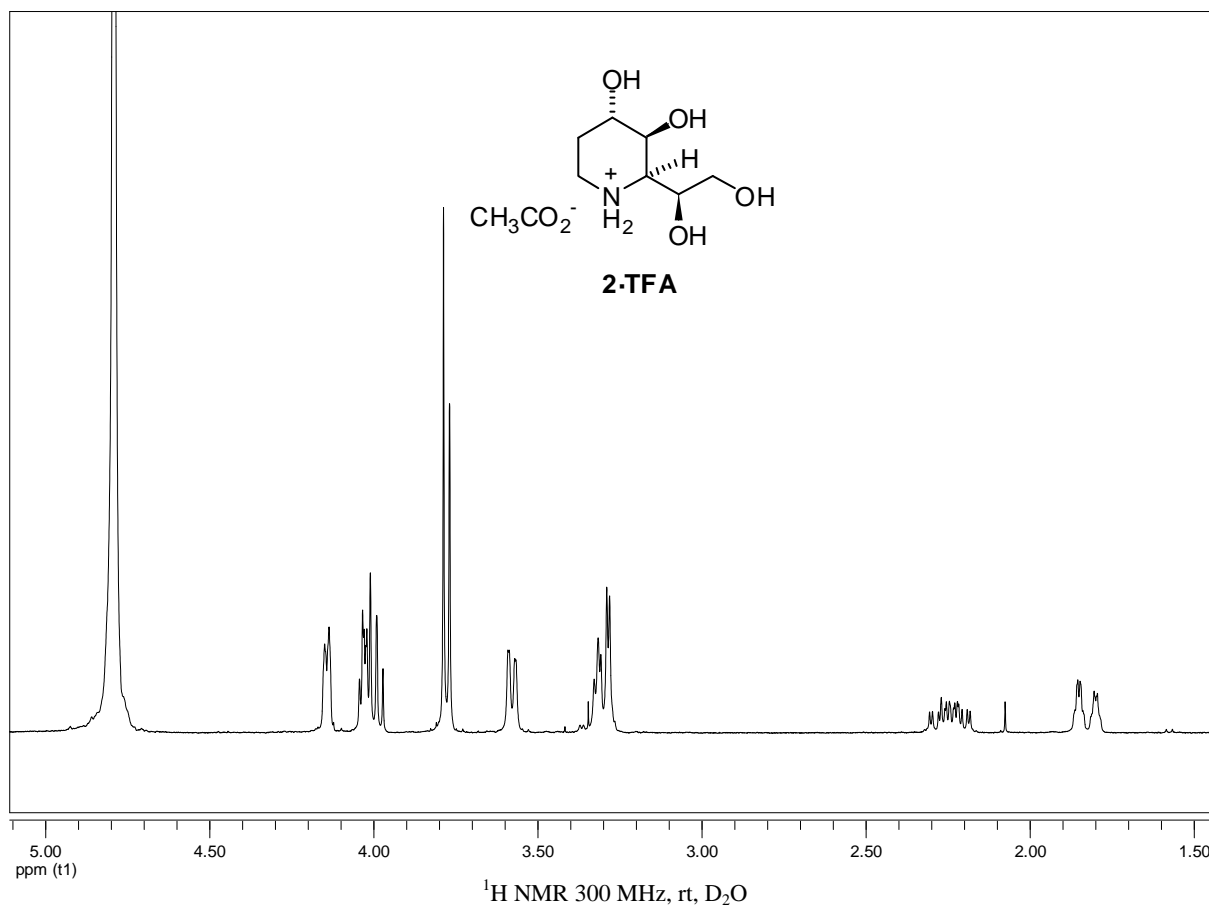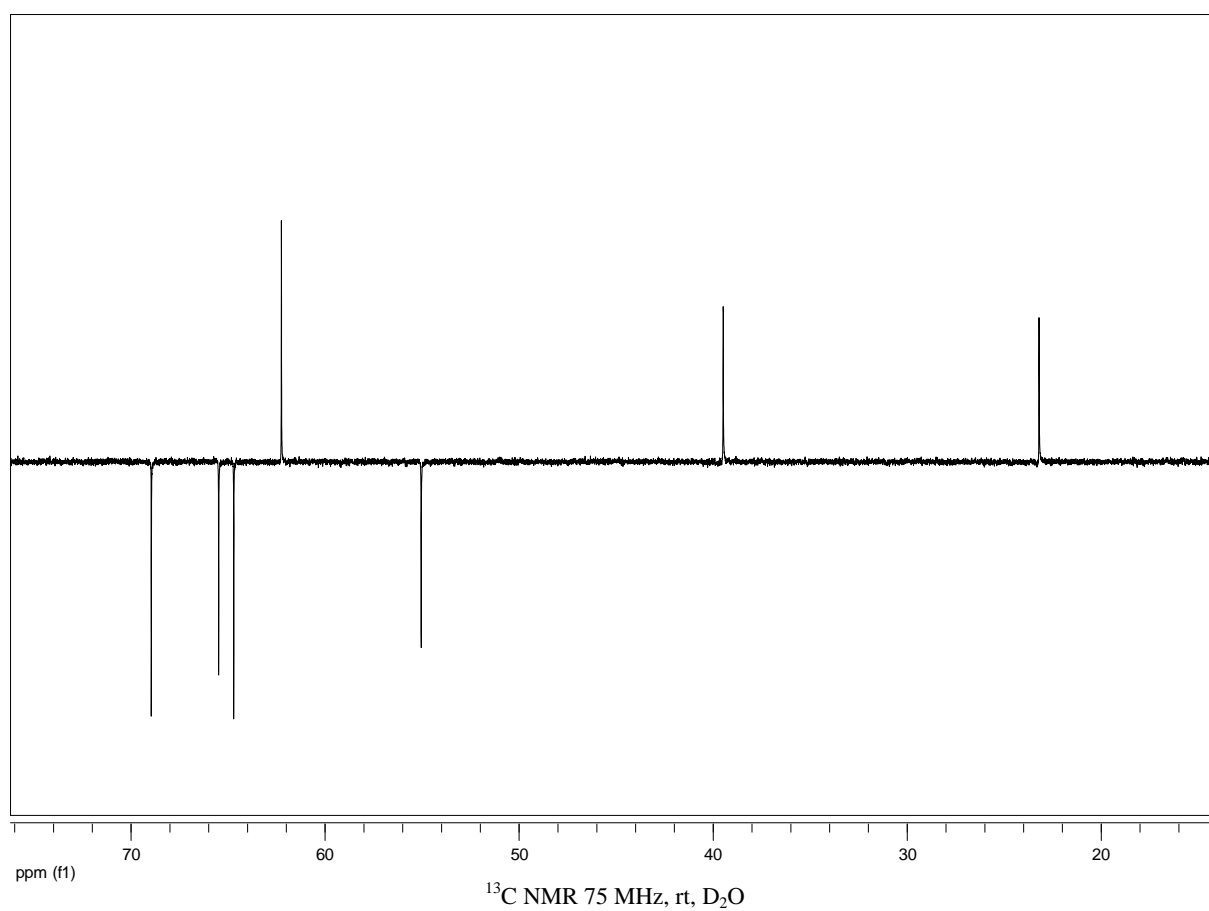

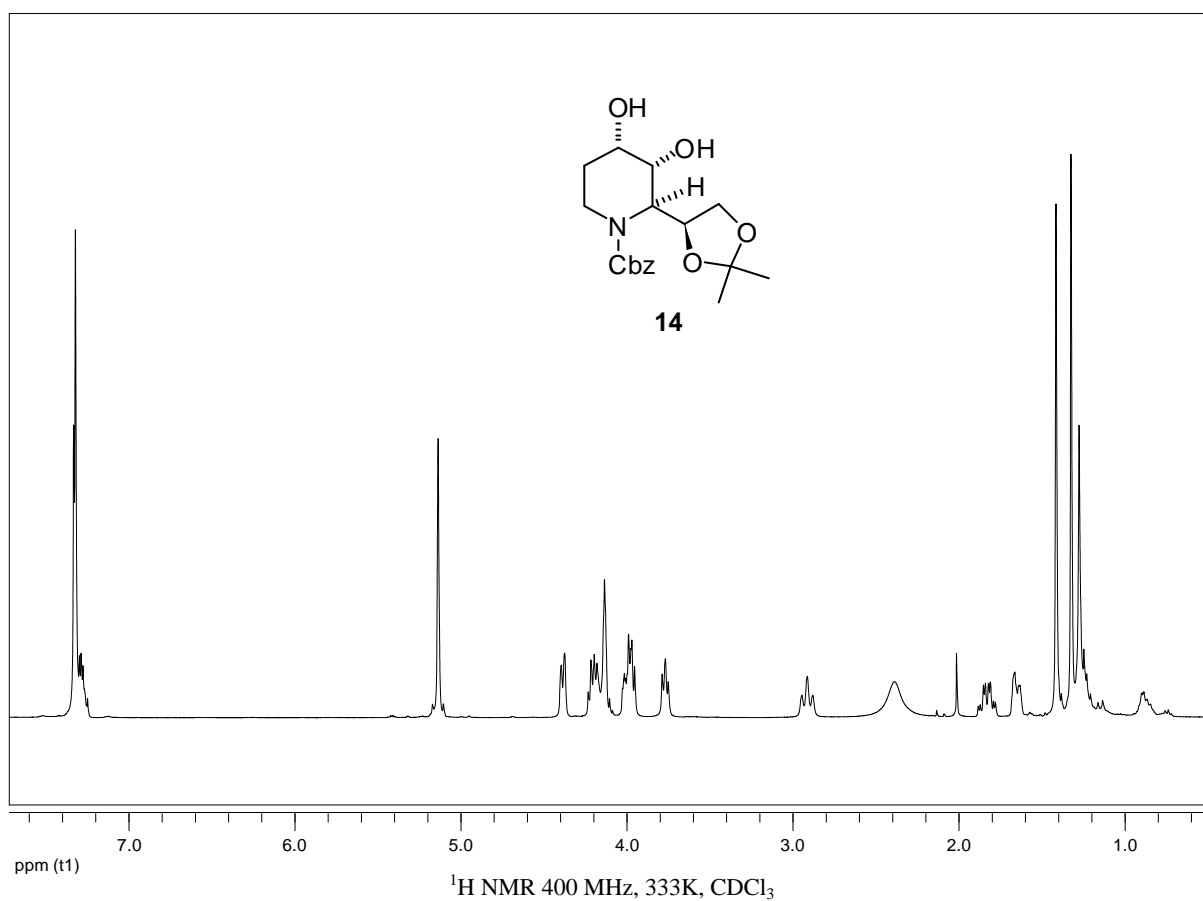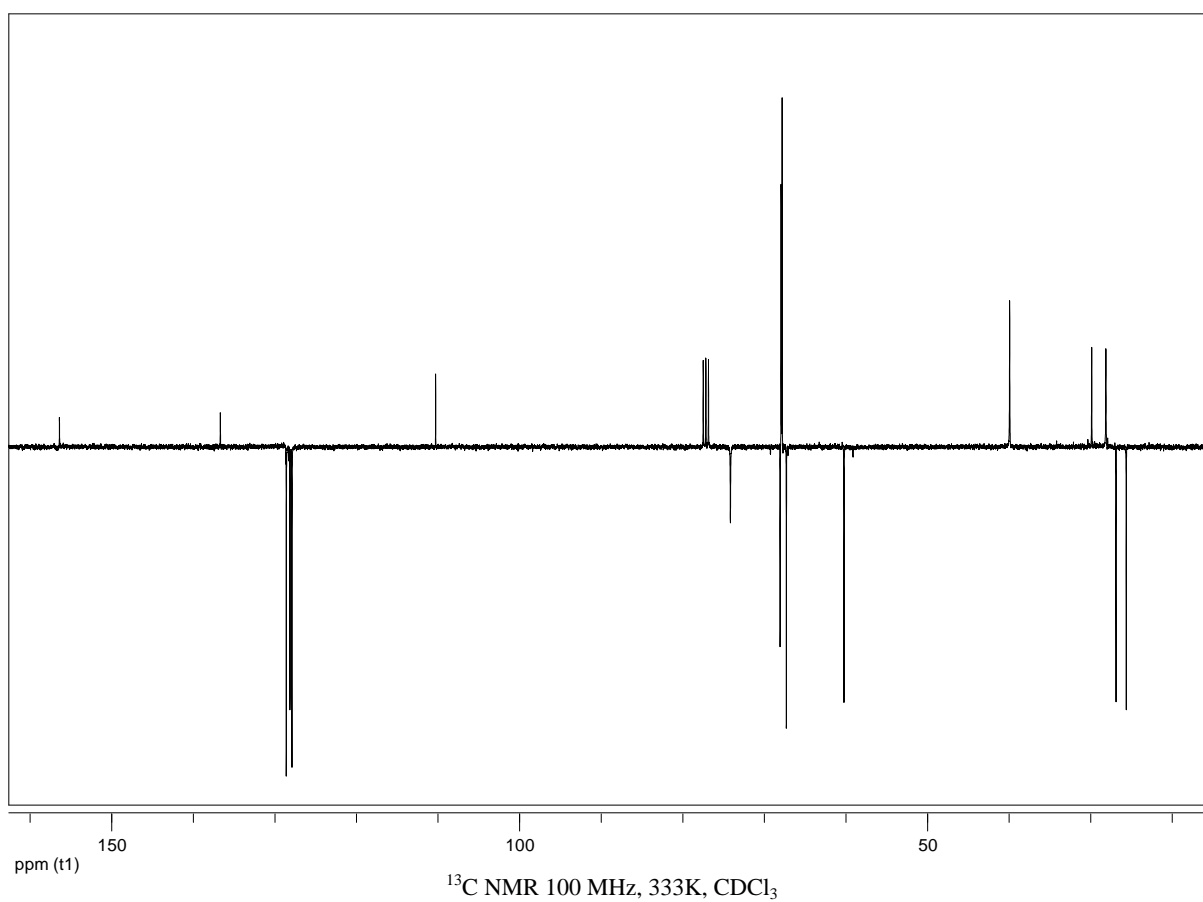

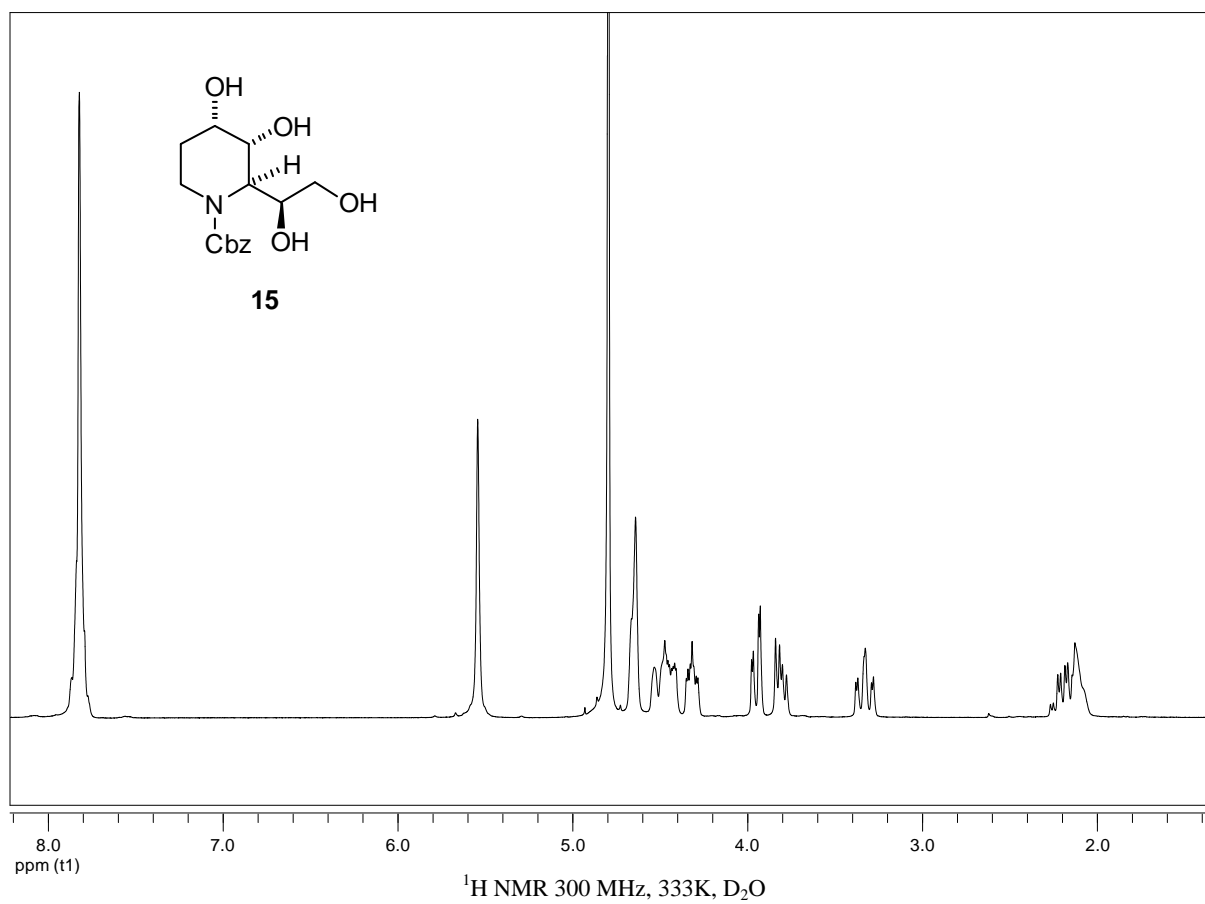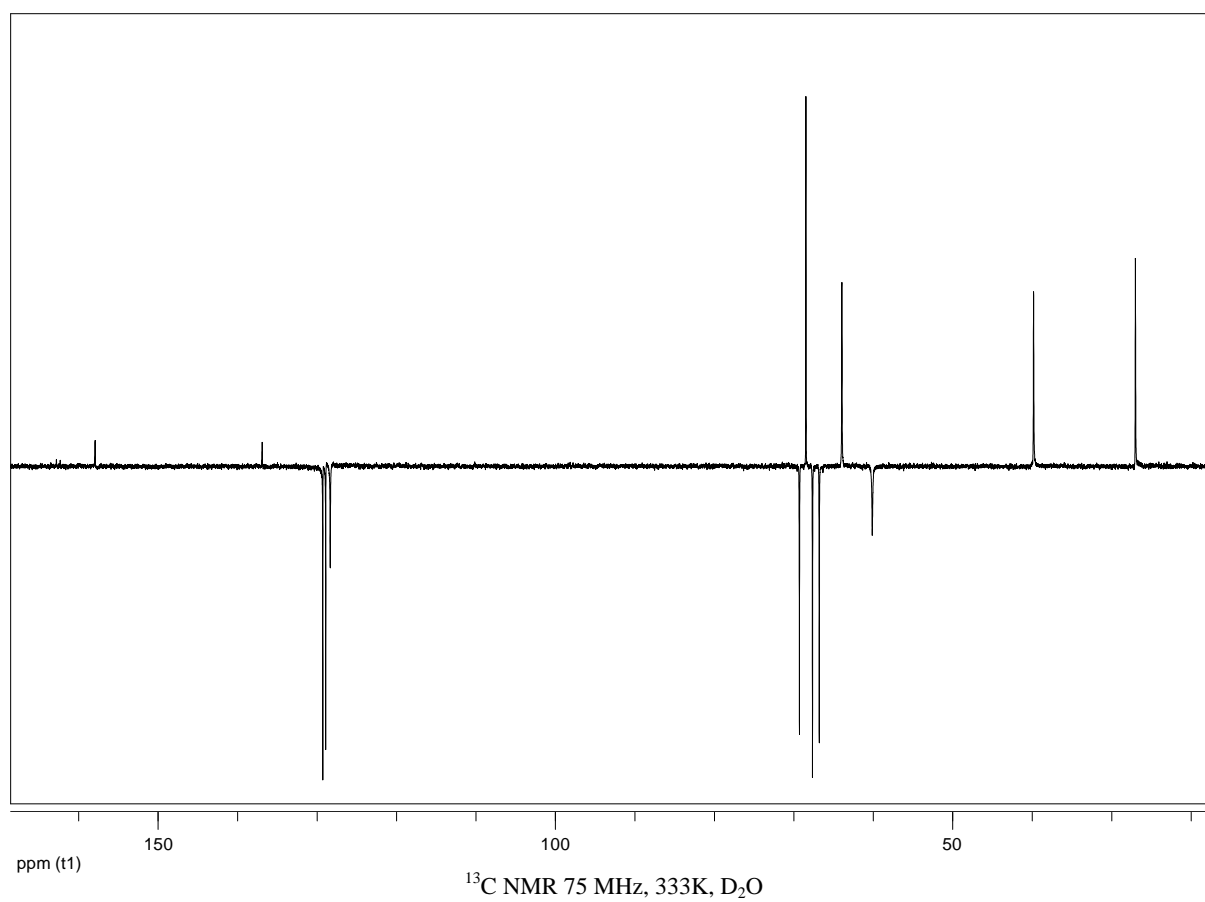

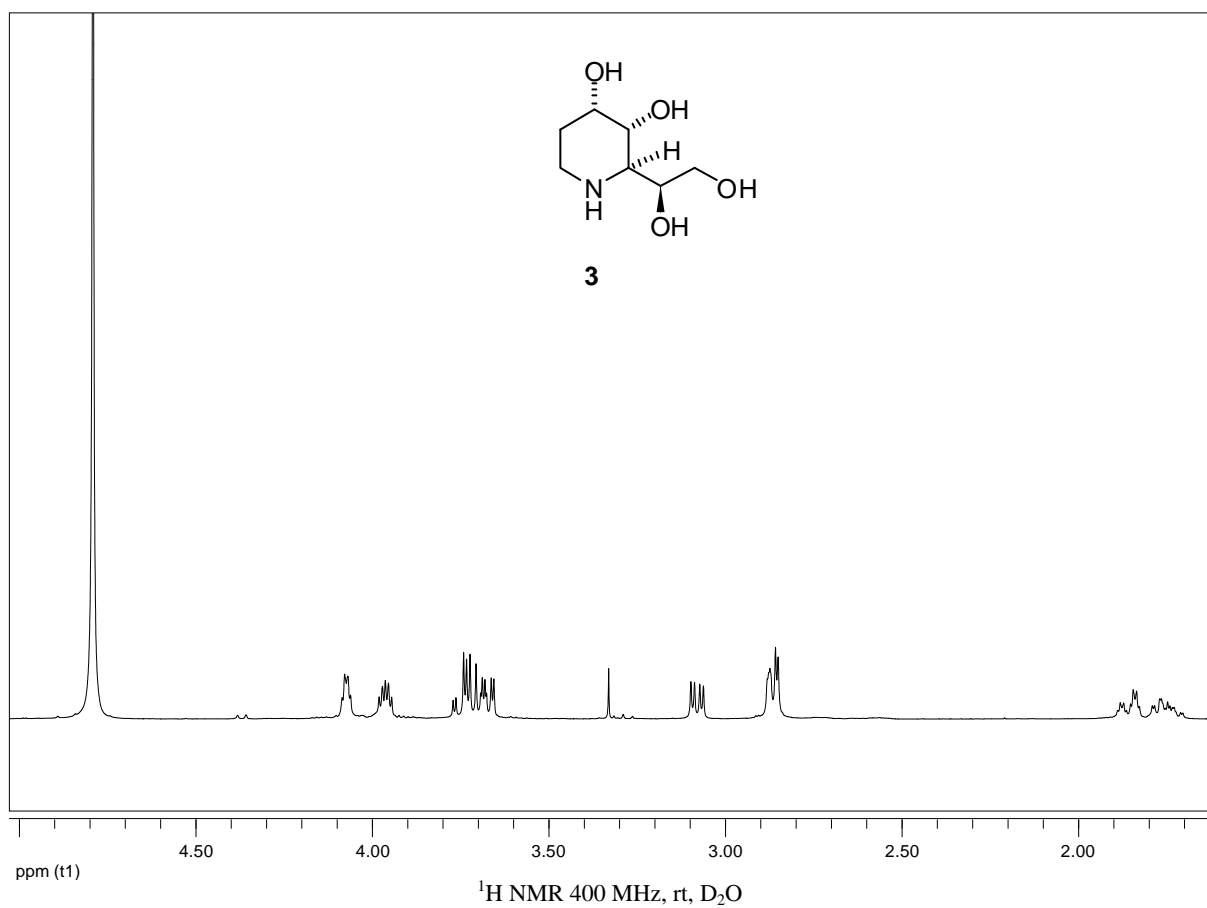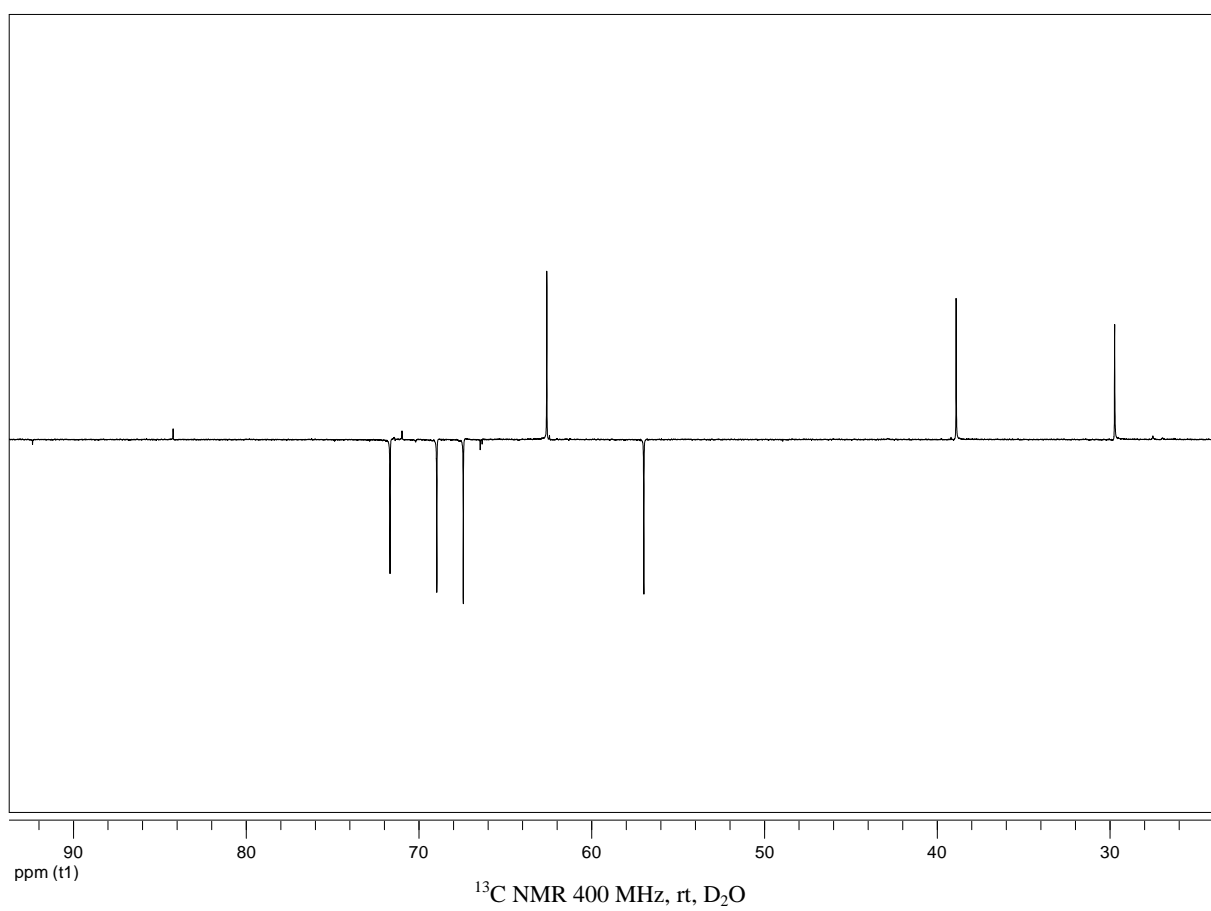



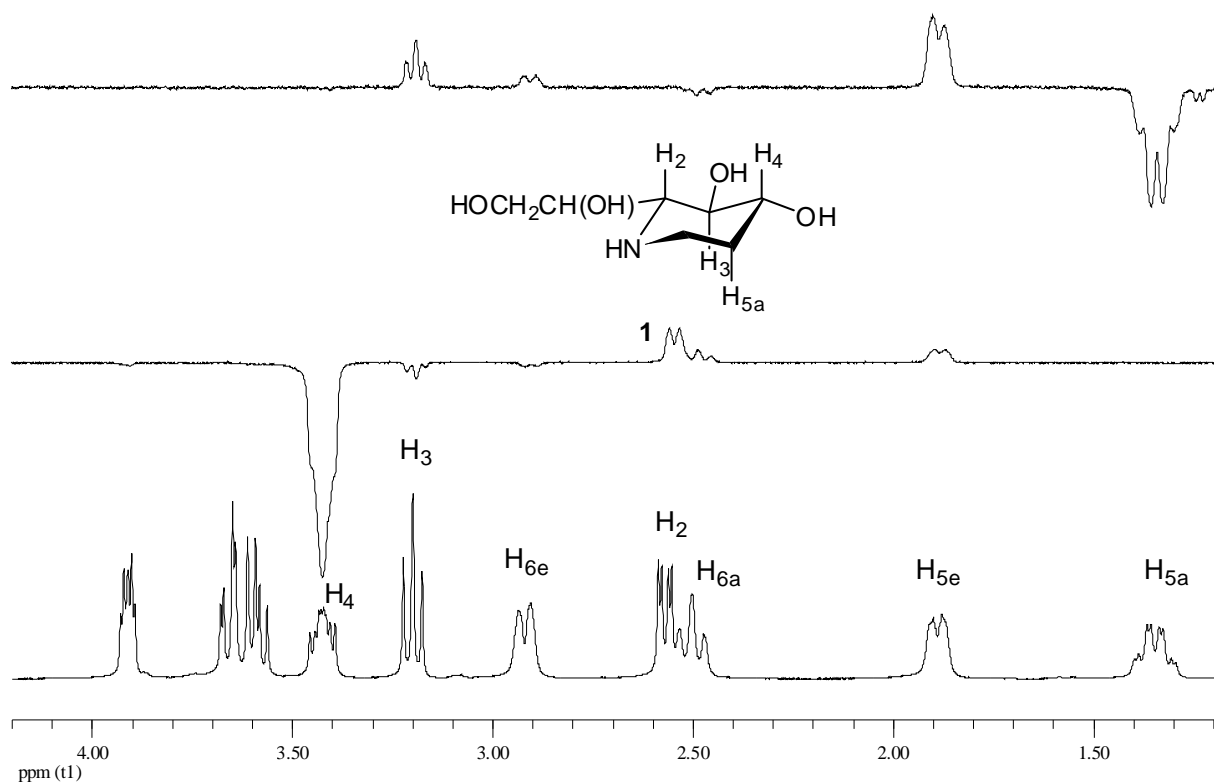

Selective ge-1D ROESY on compound **1**

**Table 1** Glycosidase inhibition assays for compounds **1**, **2** and **3**<sup>a</sup>

| enzyme                                       | source                                    | Substrate (5mM)                                 | pH   | <b>1</b> | <b>2</b> | <b>3</b> |
|----------------------------------------------|-------------------------------------------|-------------------------------------------------|------|----------|----------|----------|
| $\alpha$ -D-glucosidase                      | Yeast ( <i>Saccharomyces cerevisiae</i> ) | PNP- $\alpha$ -D-glucopyranoside                | 6.8  | -9       | 0        | 0        |
| $\alpha$ -D-glucosidase                      | <i>Bacillus sterothermophilus</i>         | PNP- $\alpha$ -D-glucopyranoside                | 6.8  | -35      | 17       | 36       |
| $\alpha$ -D-glucosidase                      | Rice ( <i>Oryza sativa</i> )              | PNP- $\alpha$ -D-glucopyranoside                | 4.0  | -11      | 0        | 11       |
| $\beta$ -D-glucosidase                       | Almond                                    | PNP- $\beta$ -D-glucopyranoside                 | 5.0  | -8       | 17       | 6        |
| $\alpha$ -D-galactosidase                    | Green coffee bean ( <i>Coffea</i> sp.)    | PNP- $\alpha$ -D-galactopyranoside              | 6.5  | -16      | -10      | 0        |
| $\beta$ -D-galactosidase                     | Bovine liver                              | PNP- $\beta$ -D-galactopyranoside               | 7.3  | 27       | 25       | 7        |
| $\alpha$ -D-mannosidase                      | Jack bean ( <i>Canavalia ensiformis</i> ) | PNP- $\alpha$ -D-mannopyranoside                | 4.5  | -6       | -20      | -15      |
| $\beta$ -D-mannosidase                       | <i>Cellulomonas fimi</i>                  | PNP- $\beta$ -D-mannopyranoside                 | 6.5  | ND       | -12      | -9       |
| <i>N</i> -acetyl- $\beta$ -D-glucosaminidase | Bovine liver                              | PNP- <i>N</i> -acetyl- $\beta$ -D-glucosaminide | 4.25 | 0        | 18       | 16       |
| <i>N</i> -acetyl- $\beta$ -D-glucosaminidase | Bovine kidney                             | PNP- <i>N</i> -acetyl- $\beta$ -D-glucosaminide | 5.0  | -20      | 8        | 6        |
| $\beta$ -D-glucuronidase                     | Jack bean                                 | PNP- $\beta$ -D-glucuronide                     | 5.0  | 0        | 0        | 0        |

<sup>a</sup>% Inhibition at 143 $\mu$ g/ml.
